# Supplementary material
Source: publisher site journal article supplement (https://www.dovepress.com/article/301855)
Supplement: Supplementary file 1 [file get_supplementary_file.php]

**Erythrocyte-camouflaged Mesoporous Titanium Dioxide Nanoplatform for an Ultrasound-mediated Sequential Therapies of Breast Cancer**

Qunying Li1, Bin Lin2, Yongzhou Li3, Nan Lu4, *

1 Department of Ultrasound, Second Affiliated Hospital of Zhejiang University, School of Medicine, Hangzhou, Zhejiang 310009, China; 2 Department of Radiology, The Second Affiliated Hospital, Zhejiang University School of Medicine, Hangzhou, Zhejiang, 310009, China; 3 Department of Surgery, The Second Affiliated Hospital, Zhejiang University School of Medicine, Hangzhou, Zhejiang, China; 4 Department of Radiology, The Second Affiliated Hospital, Zhejiang University School of Medicine, Hangzhou, Zhejiang, 310009, China.

*Corresponding authors: Nan Lu

Department of Radiology, The Second Affiliated Hospital, Zhejiang University School of Medicine, Hangzhou, Zhejiang 310009, China

Tel: 86+13674665528

Fax: 86+13674665528

E-mail address: 2317075@zju.edu.cn

**Materials**

Titanium butoxide (GC, 99.0%), ethanol, N-(3-dimethylaminopropyl)-N-ethylcarbodiimide and heptanoic acid (AR, 98.0%) were from the Sigma-Aldrich Co. Other chemical materials were purchased from China National Pharmaceutical Group Corporation RPMI-1640 medium and fetal bovine serum (FBS) were purchased from GIBCO. Diagnostic kits for phosphocreatine kinase (CK)alanine aminotransferase (ALT), aspartate aminotransferase (AST) and blood urea nitrogen (BUN) were obtained from Shanghai Renjie Bioengineering Company.

**Statistical analysis**

Differences between groups were analyzed by Student’s t-test. Differences among more than two groups were analyzed by one-way analysis of variance. Bonferroni post hoc test was used to analyze differences between any two groups. P < 0.05 indicates a significant difference.

**Figure Caption**


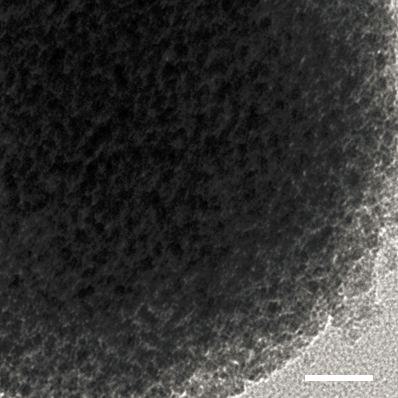


**Figure S1.** High-resolution transmission electron microscopy image of TNPs. Scale bar, 5nm.


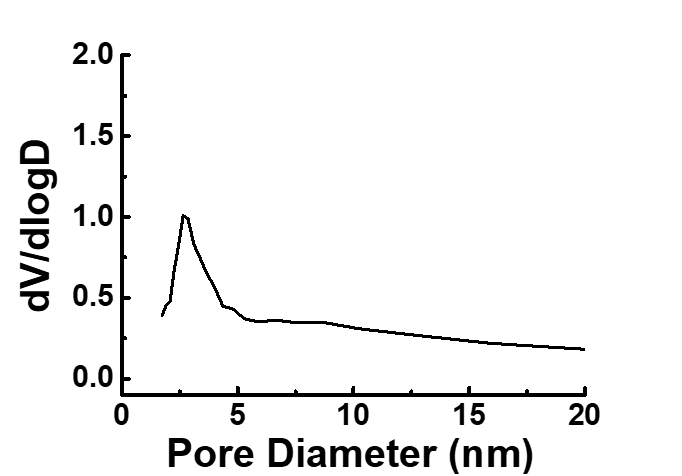


**Figure S2.** Pore size distribution of TNPs


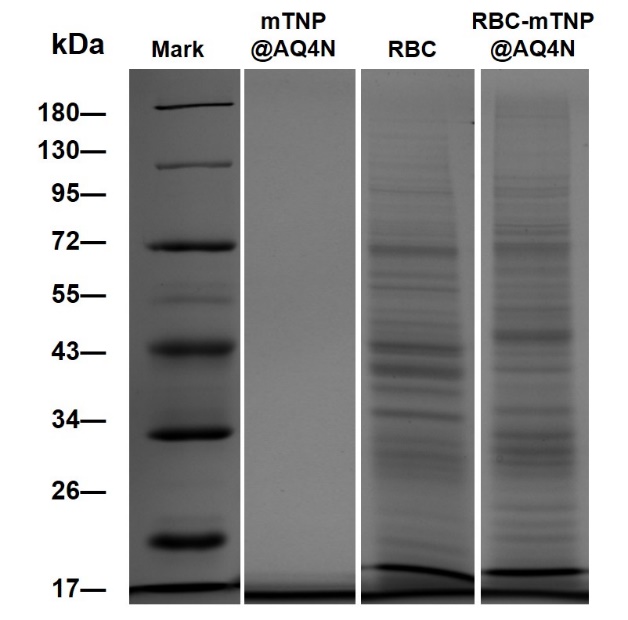


**Figure S3.** SDS-PAGE protein analysis of the mTNP@AQ4N, RBC and RBC- mTNP@AQ4N.


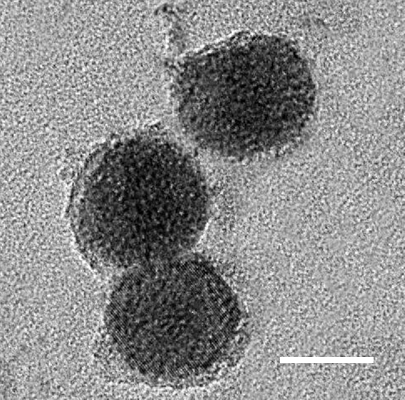


**Figure S4.** TEM image of RBC-TNP@AQ4N after irradiation by US. Scale bar, 30 nm.


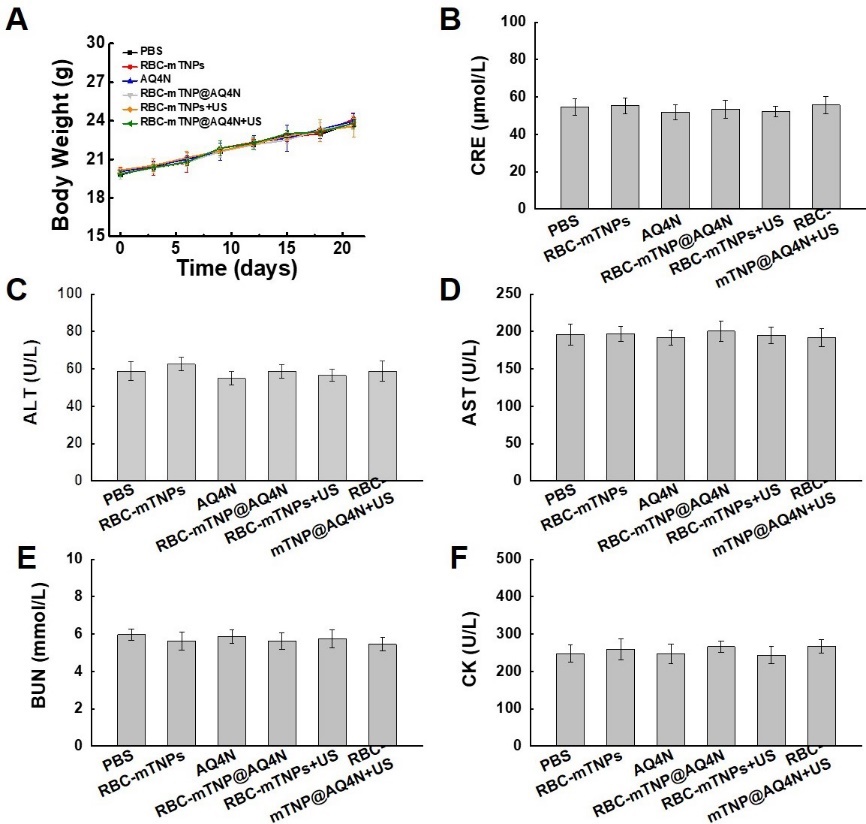


**Figure S5.** Body weight (A) and blood biochemical indicators including CRE (B), ALT (C), AST (D) BUN (E) and CK (F). All the data represent mean ± S.D. (n=4).
